# Supplementary material
Source: Springer Nature journal article supplement (https://www.springermedizin.de/resource/supplementary/12936_2012_2533_MOESM10_ESM.pdf/9543200)

Values relative to untreated mosquitoes

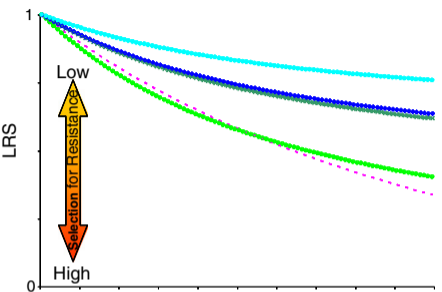

Values relative to mosquitoes treated with instant-kill insecticides

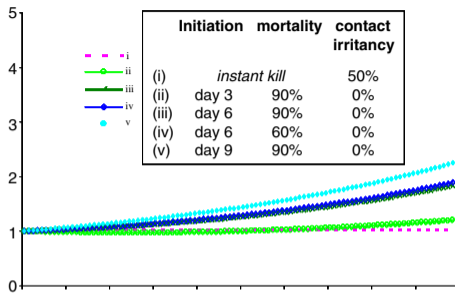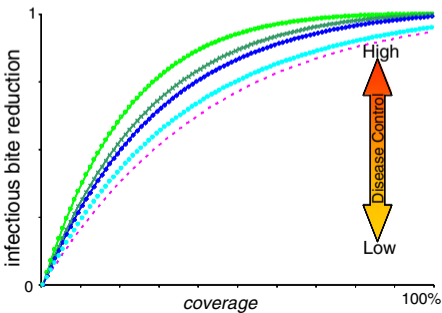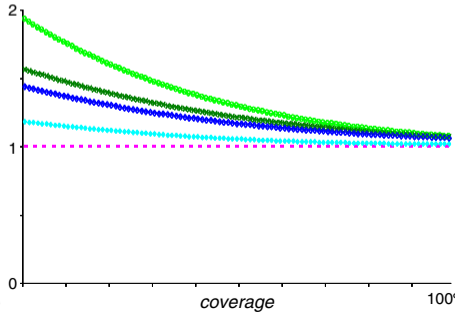

Supplement: MOESM10 [file 9543200]
